# Supplementary material for: A new species of deep-sea grunt, Rhonciscus pauco (Lutjaniformes: Haemulidae), from Puerto Rico
Source: PeerJ. 2022 Jun 2;10:e13502. doi: 10.7717/peerj.13502 (PMC9167586; doi:10.7717/peerj.13502)
Supplement: Supplemental Information 1 [file peerj-10-13502-s001.xlsx]

## Sheet: Sheet1
#	Meristics	Holotype	Paratype	1	2	3	4	5	6	7	8	9	10	11	12	13	14
1	Dorsal fin	XIII, 12	XIII, 12	XIII, 12	XIII, 12	XIII, 12	XIII, 12	XIII, 12	XIII, 12	XIII, 12	XIII, 12	XIII, 12	XIII, 12	XIII, 12	XIII, 12	XIII, 12	XIII, 12
2	Anal fin	III, 7	III, 7	III, 7	III, 7	III, 7	III, 7	III, 7	III, 7	III, 7	III, 7	III, 7	III, 7	III, 7	III, 7	III, 7	III, 7
3	Pectoral fin rays	16	17	15	16	15	15	16	16	16	16	15	16	15	15	15	16
4	First arch gill-rakers (upper + lower limb)	5+11	5+11	5+11	5+11	5+11	5+11	5+11	5+11	5+11	5+11	5+11	5+11	5+11	5+11	5+11	5+11
5	Lateral line scales	50	50	50	50	50	50	50	50	49	48	50	48	50	49	50	50
	Morphometrics (mm)
6	Total length	266	305	280	283	237	234	240	275	240	233	225	244	250	225	243	235
7	Standard length	229	244	240	250	195	198	205	237	205	199	190	210	215	190	206	199
8	Head length	78.8	90.9	72	82.7	60.8	63.7	63.3	77.7	72.5	68.3	61.2	68	69.9	61.2	69.3	61.8
9	Eye diameter	23.5	24.8	23	24.3	19.6	20	20.5	22.9	20.6	20.1	18	19.8	21	17.8	21.4	19.2
10	Snout length	22.3	28	21	20.3	15.1	15.6	18.3	22	18.6	19.5	16.5	18.8	17.2	15.3	17.9	15.1
11	Maxilla length	21	24.8	24	23.6	20.2	18.3	19.8	22.3	20	21.4	16.8	18	19.8	16.9	21.4	17.4
12	Interorbital length	18.8	22.1	34	28.5	21.3	21.8	21	26.7	19.5	16.3	16.9	20	19.5	18.9	20.8	16.9
13	Maximum body depth	73.9	91.2	80.8	83.7	70.5	68.3	67.4	80.3	69.1	63.7	63.9	68.1	68.6	61.5	67.5	67.3
14	Caudal peduncle depth	22.7	23.4	24.5	24.2	20.4	20.7	20.8	24.7	21.4	20.5	20.9	19.6	24	20.7	22.8	22.5
15	Caudal peduncle length	40.8	42.9	39.8	47.4	36.3	33.3	39.4	47.4	39.1	36	29.6	32	36	34	40.4	30.3
16	Predorsal length	72.6	85	74.4	83.4	60.4	60.8	65.8	79.2	68.8	70.9	60	67.1	73.4	60.6	67.3	63.4
17	Preanal length	156	174	172	172	139	143	143	163	144	142	135	147	154	138	148	140
18	Prepelvic length	92.9	95	87.6	94.6	75	78.4	80.3	90.2	81.2	76.4	73.7	77.7	81.5	69.4	76.6	73.7
19	Prepectoral length	78	85.8	76.8	85.9	62	70.2	68.3	79.4	78.8	67	62.7	73.1	71.5	61.1	71.5	67.3
20	Pectoral length	65.5	79.4	74.2	75.6	59.5	61.8	57.2	68.4	59.3	59.6	56.6	61.7	60.6	58.7	59.6	56.7
21	First anal spine	24.1	16.8	15.7	12.7	17	14.3	15.3	15	13.9	14.9	12.5	12.1	15.3	13.5	12.7	12.4
22	Second anal spine	37.6	47.2	44.2	45.8	38.5	40.7	41.2	45.7	40.3	39.8	37.6	42.4	41.9	40.4	41	43.4
23	Third anal spine	25.1	29.8	27.9	25.9	27.1	24.9	25.7	29.4	26.7	23.7	22.5	22.4	28.9	24.1	24.3	27.7
24	Pelvic length	47	55.3	48.5	45.7	39.3	43.1	37.3	46.1	42	37.4	39.2	41.9	43.3	38.3	39.3	42.2
25	Pelvic length including filament	53.1	61.1	53.9	53.9	43	45.7	46	52.7	46.7	46.8	44.5	48.1	45	45.4	47.1	46
26	First dorsal spine	10.9	11.8	11.4	7.3	11.3	9.7	10.2	9.4	10.3	8.3	7.6	10.3	8.1	7.5	8.2	9.2
27	Fourth dorsal spine	37.5	42.3	36.8	38.5	37.2	35.8	36.1	28.6	37	34.4	32	34.6	33.6	30.5	32.4	35
28	Fifth dorsal spine	38.9	43.7	36.3	37.7	37.3	35.9	33.1	36.8	35.3	33.5	30.9	35.5	31.6	30.2	32.6	35.8
29	Penultimate dorsal spine	18.2	22.4	20.3	19.9	18	17.4	18.7	17.5	18.2	15.9	17.2	18.8	18.5	15.7	16.7	19
30	Last dorsal spine	18.1	22.9	17.2	19.7	17.8	17.2	18.3	18.1	18	17.1	17.4	19.4	19.1	17.6	16.2	16.4
31	First dorsal ray	25.9	31.7	25.9	30.8	24.5	26.6	26.1	31.8	27.4	25.7	24.4	25.7	28.2	23.8	24.7	22.7
32	Anterior narine	6	5.7	4	5.8	5.1	4.4	4.6	5.5	4.8	3.9	3.8	3.9	5.4	3.4	4.4	4.2
33	Posterior narine	3.6	3.7	3	4.4	2.5	2.5	3.3	3.2	2.9	2.9	1.9	2.5	2.8	1.7	2.1	2.5
